# Supplementary material
Source: PubMed Central journal article supplement (PMC4793998)

**Appendix 2: Supplementary figures A-C [posted as supplied by author]**

**Figure A** Funnel plot. Plot of effect size between paracetamol and placebo versus their respective standard error. Each circle represents one trial.

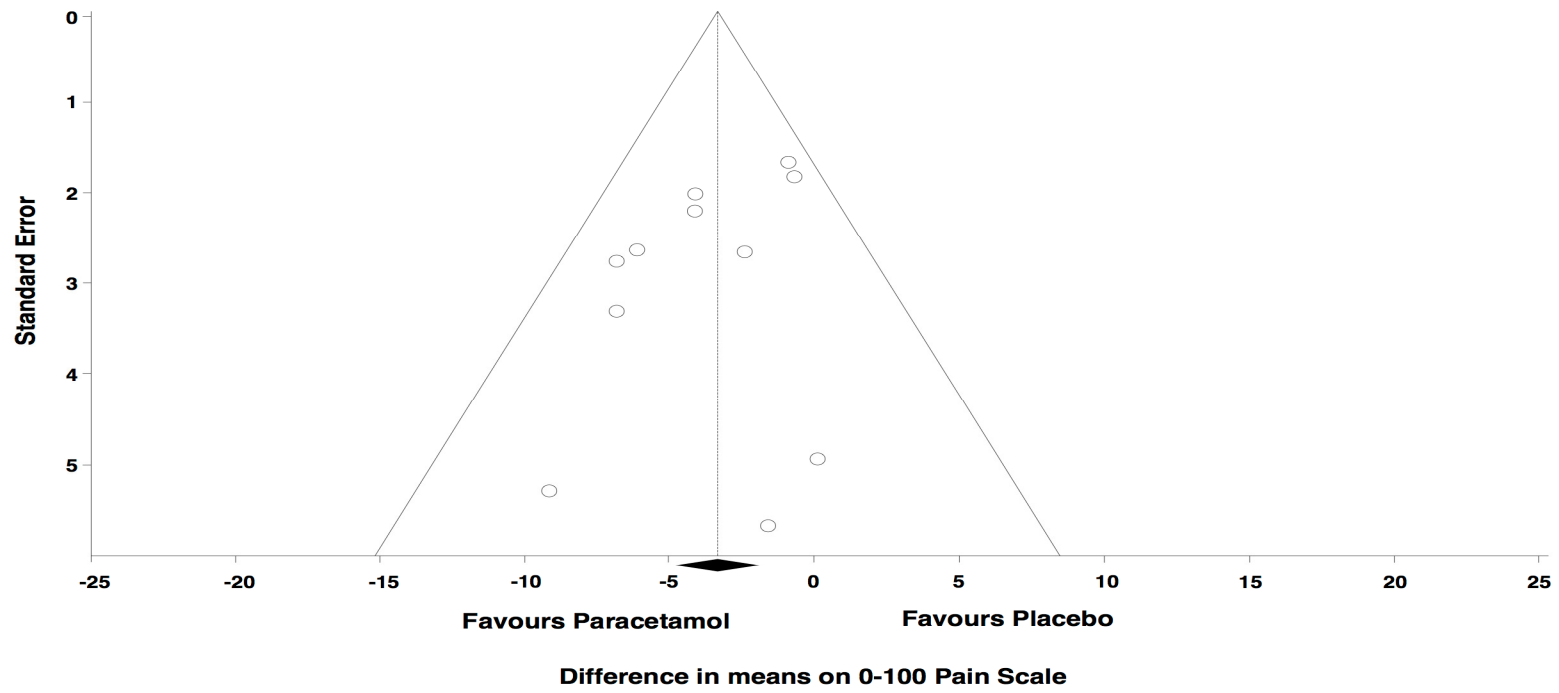

**Fig B** Secondary exploratory analysis of aspects of individual risk of bias domains on pooled osteoarthritis short-term pain estimates. WMD=Weighted mean difference, CI=Confidence interval.

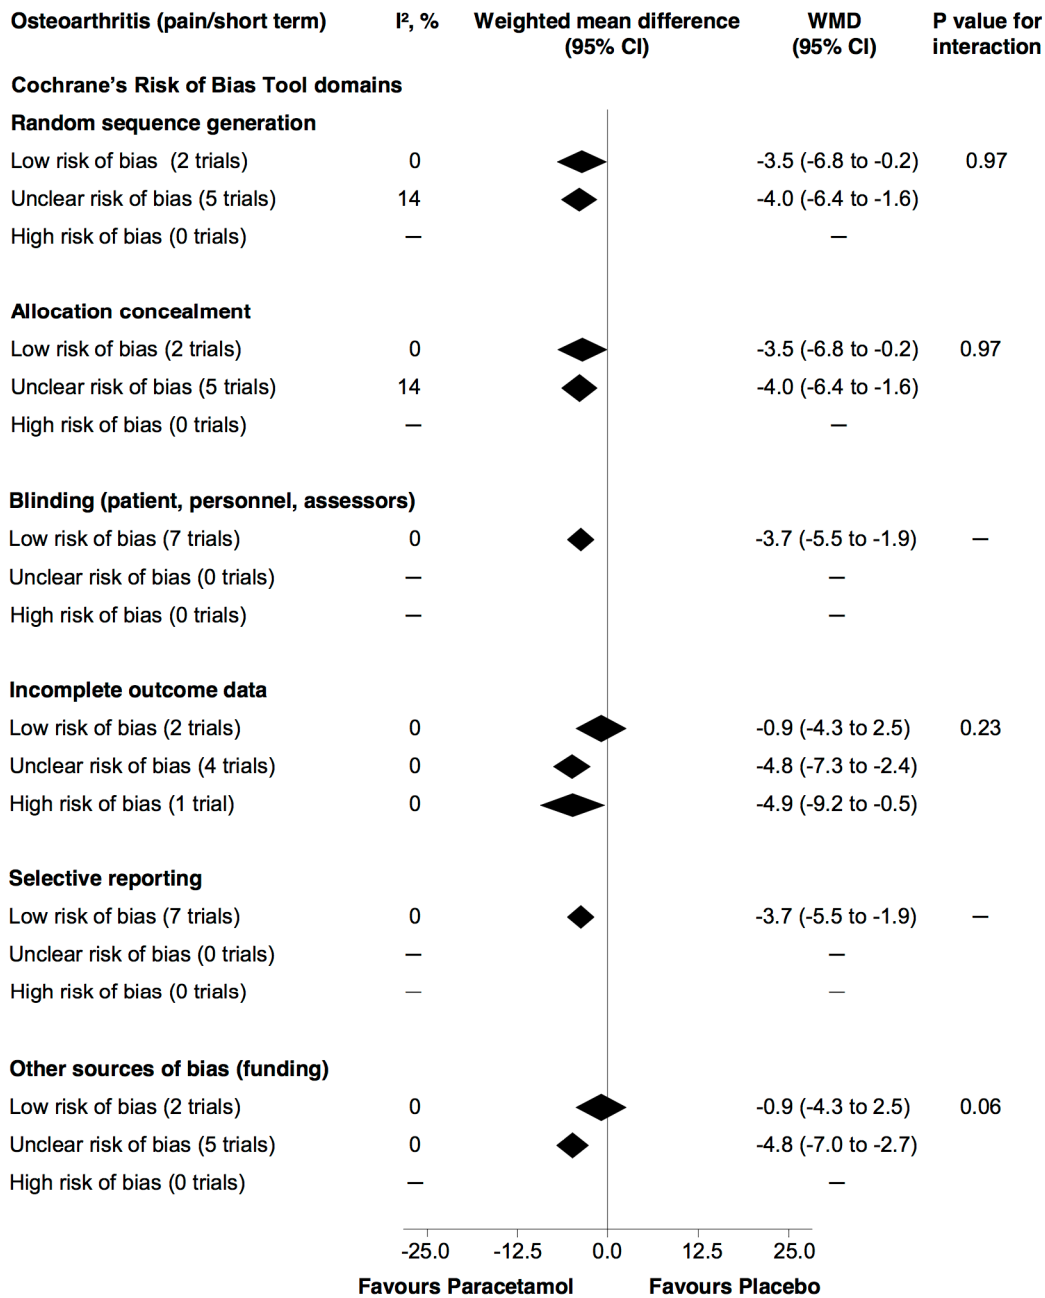

**Fig C** Extended funnel plots showing the predicted consequences of a further trial on the meta-analysis of the effects of paracetamol compared to placebo for spinal pain and osteoarthritis.

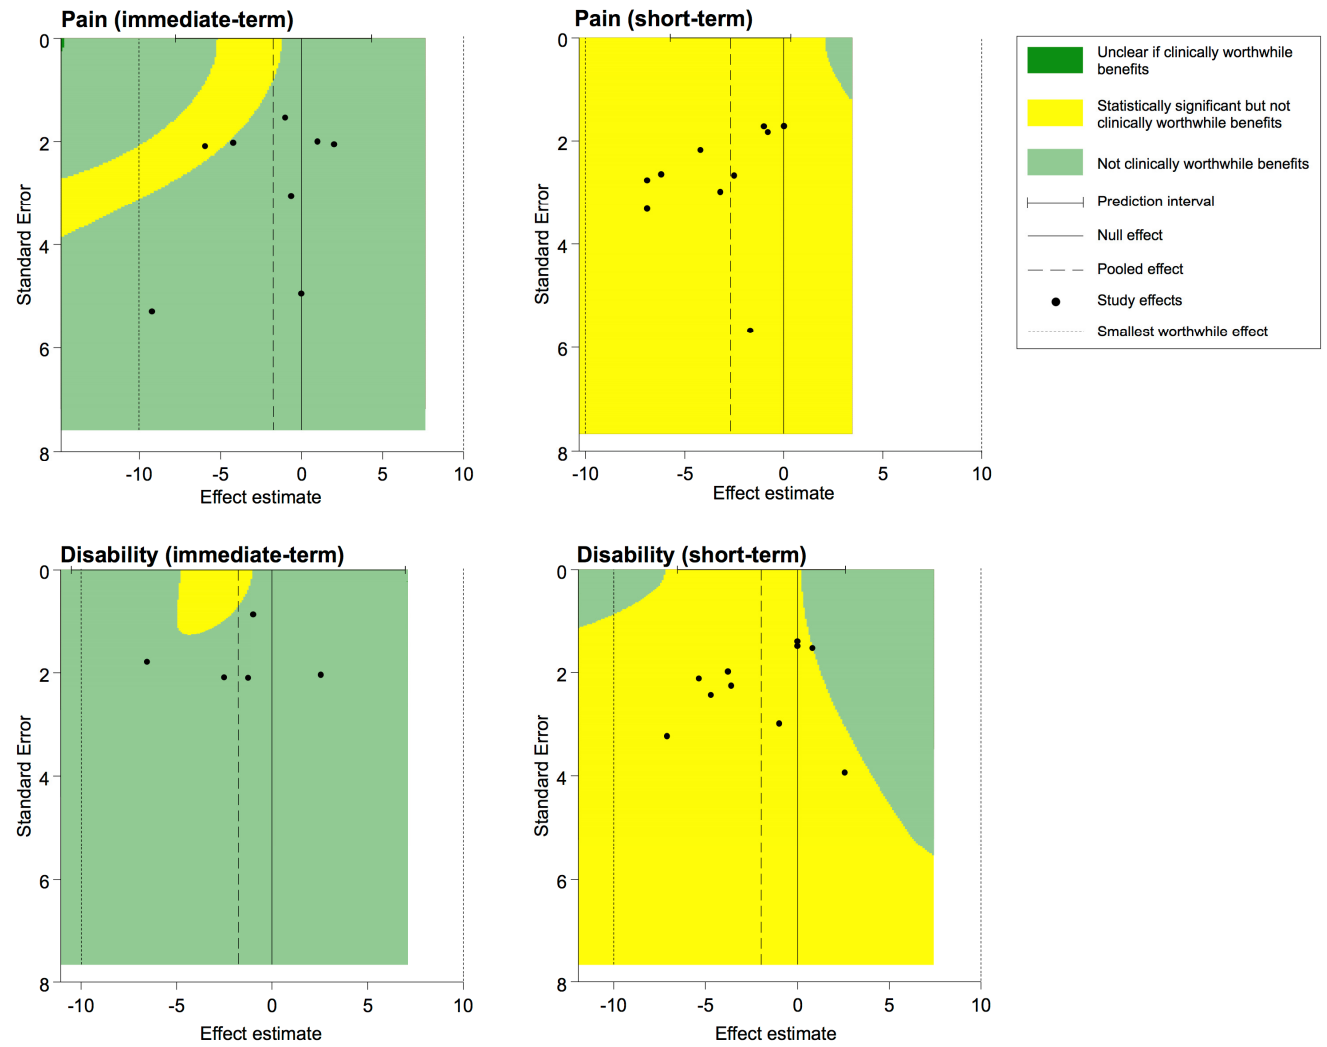

Supplement: macg022316.ww2_default.pdf [file macg022316.ww2_default.pdf]
